# Supplementary material for: Carbon nanotube-supported dendritic Pt-on-Pd nanostructures: growth mechanism and electrocatalytic activity towards oxygen reduction reaction
Source: Royal Society of Chemistry journal article supplement (doi:10.1039/c3ta13954a), 2013-11-28

## **Carbon Nanotube-Supported Dendritic Pt-on-Pd Nanostructures: Growth Mechanism and Electrocatalytic Activity Towards Oxygen Reduction**

Sourov Ghosh, Siniya Mondal and C. Retna Raj\*  
Department of Chemistry, Indian Institute of Technology Kharagpur  
Kharagpur 721302, India  
E-mail: [crraj@chem.iitkgp.ernet.in](mailto:crraj@chem.iitkgp.ernet.in)

**Table S1**

The diffraction parameters obtained from the XRD profile of the different electrocatalyst.

| <b>Catalyst</b>                       | <b><math>2\theta_{(111)}</math></b> | <b><math>2\theta_{(200)}</math></b> | <b><math>2\theta_{(220)}</math></b> | <b><math>2\theta_{(311)}</math></b> | <b><math>2\theta_{(222)}</math></b> |
|---------------------------------------|-------------------------------------|-------------------------------------|-------------------------------------|-------------------------------------|-------------------------------------|
| <b>Only Pt</b>                        | 39.95                               | 46.51                               | 67.86                               | 81.86                               | 86.37                               |
| <b>Pt<sub>64</sub>Pd<sub>36</sub></b> | 39.96                               | 46.51                               | 67.89                               | 81.89                               | 86.47                               |
| <b>Pt<sub>52</sub>Pd<sub>48</sub></b> | 40.018                              | 46.48                               | 67.92                               | 81.91                               | 86.47                               |
| <b>Pt<sub>21</sub>Pd<sub>79</sub></b> | 40.03                               | 46.58                               | 67.96                               | 81.98                               | 86.56                               |
| <b>Only Pd</b>                        | 40.05                               | 46.61                               | 68.01                               | 81.98                               | 86.56                               |

## Figure S1

Possible growth mechanism of Pt-on-Pd nanodendrites was investigated by TEM measurement. The size, shape and morphology of the initial Pd nanoparticle gradually changes during the growth of Pt dendrites over the Pd nanoparticles.

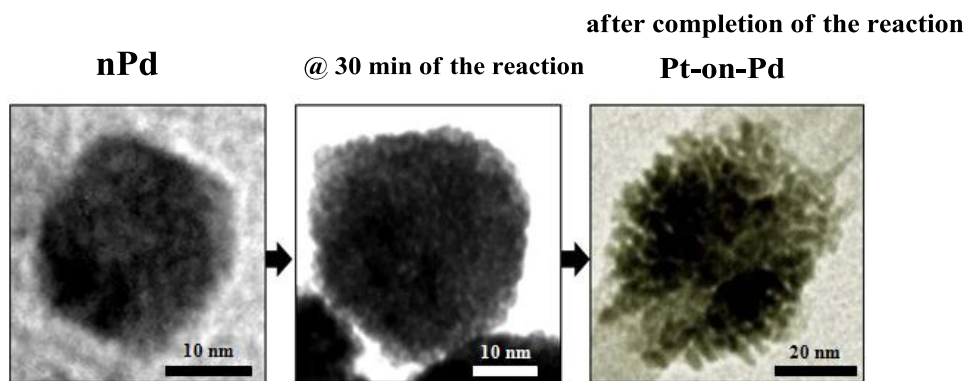

Average size: nPd ~22 nm

Pt-on-Pd at 30 min of the reaction: ~40 nm

Pt-on-Pd after the completion of the reaction: ~55 nm

## Figure S2

UV-vis spectra illustrating the absence of galvanic displacement reaction between Pt(II) complex and Pd nanoparticles in the presence of DHA.

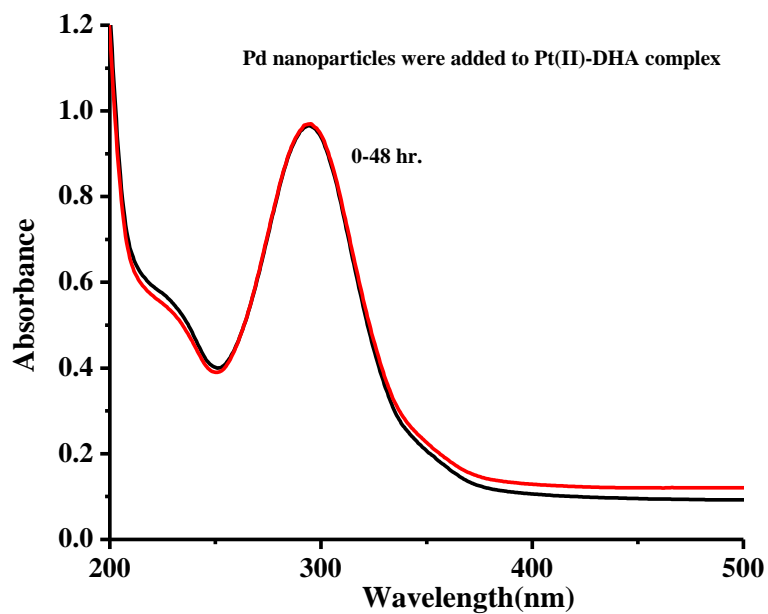

**Figure S3**

XRD profile for the MWCNT-supported Pt, Pd and Pt-Pd bimetallic nanostructures.

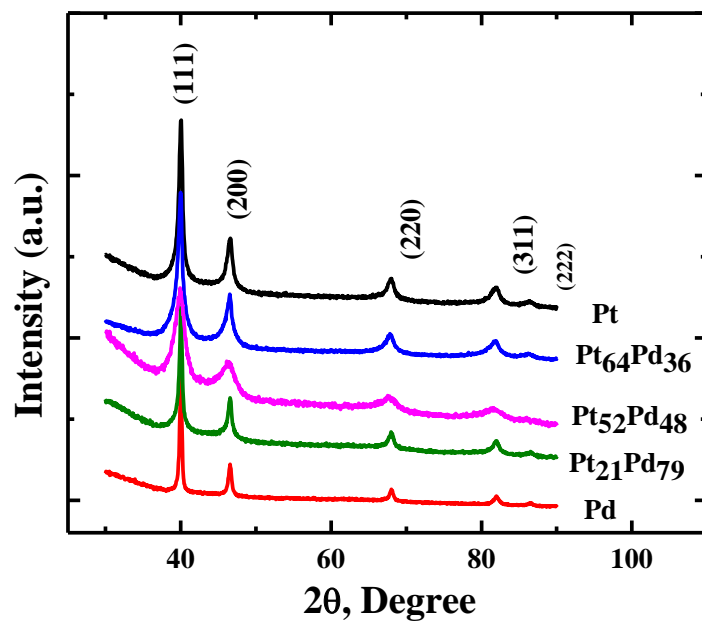

## Figure S4

TEM images of MWCNT supported Pt (a) and Pd (b) nanoparticles.

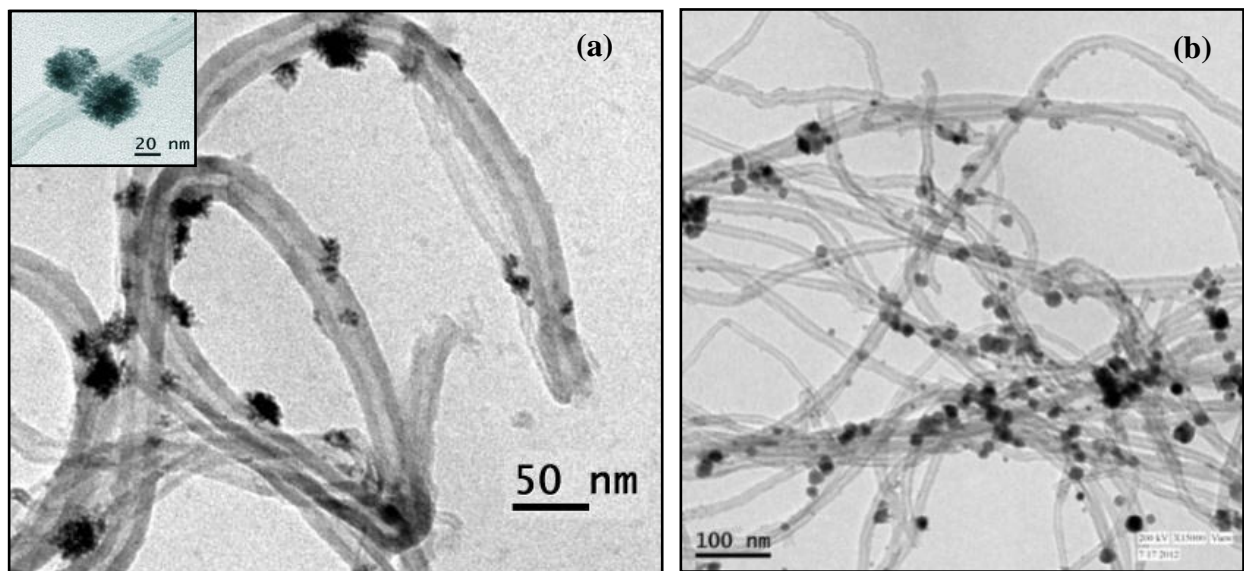

### Figure S5

Energy dispersive spectral profile of the nanoparticles obtained at an intermediate stage of the synthesis of Pt<sub>64</sub>Pd<sub>36</sub>.

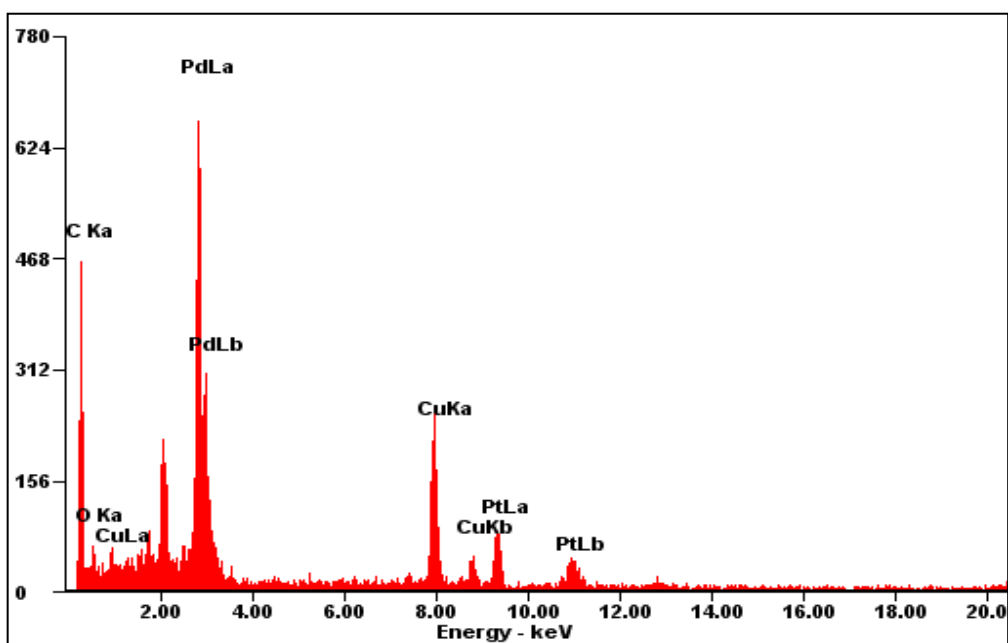

**Figure S6**

Cyclic voltammetric profile of Pt<sub>64</sub>Pd<sub>36</sub>, Pt<sub>52</sub>Pd<sub>48</sub>, Pt<sub>21</sub>Pd<sub>79</sub> and Pt electrocatalyst-modified electrode in 0.5 M H<sub>2</sub>SO<sub>4</sub>. Scan Rate: 100mV/s.

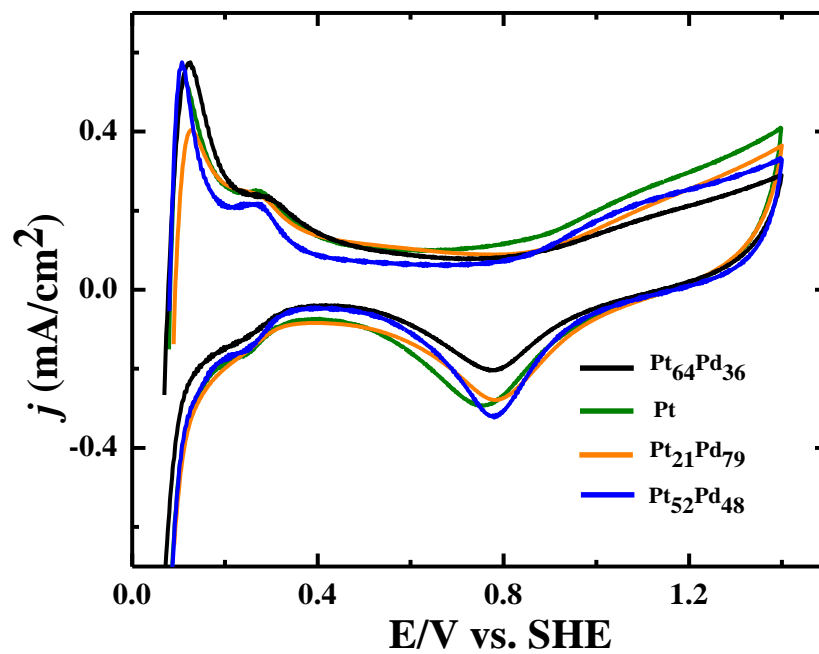



### Figure S7

Rotation-dependent polarization curves for ORR on Pt<sub>64</sub>Pd<sub>36</sub>nanoparticles decorated MWCNT modified electrode in 0.5 M H<sub>2</sub>SO<sub>4</sub>. Scan rate: 5 mV/s. Ring potential: 0.85 V. The limiting current is normalized with geometrical surface area of the electrode.

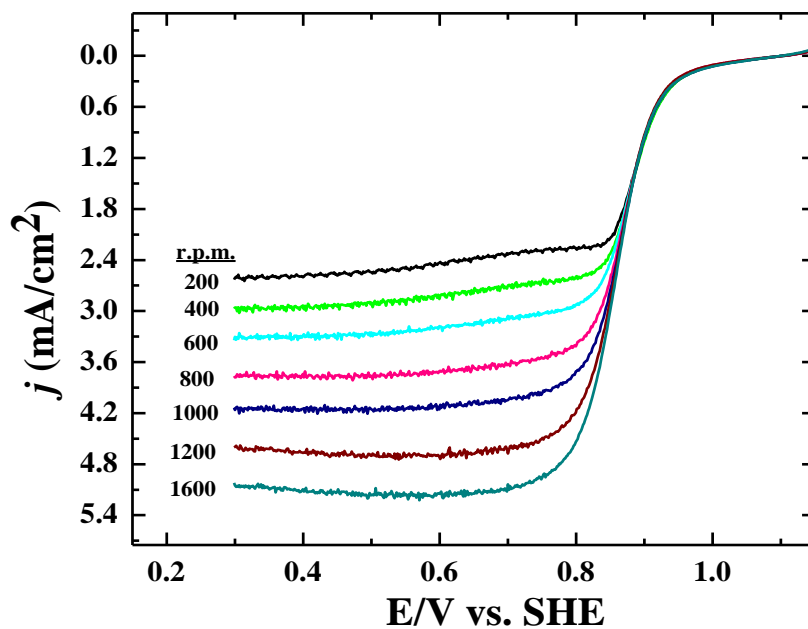

**Figure S8**

Plot illustrating the area specific activity of different catalyst towards ORR at the potential of 0.9 V.

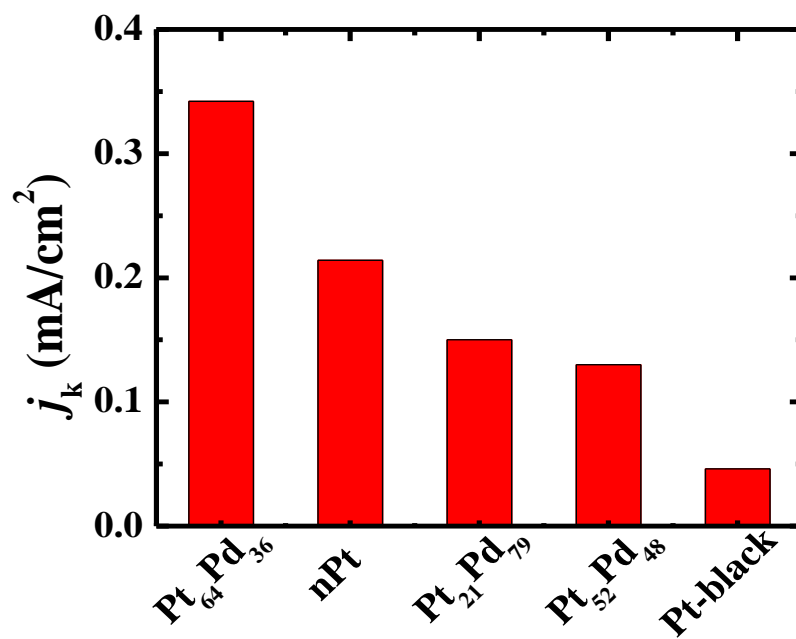

### Figure S9

Figure illustrating the change of specific activity of different catalyst with respect to the Pt content.

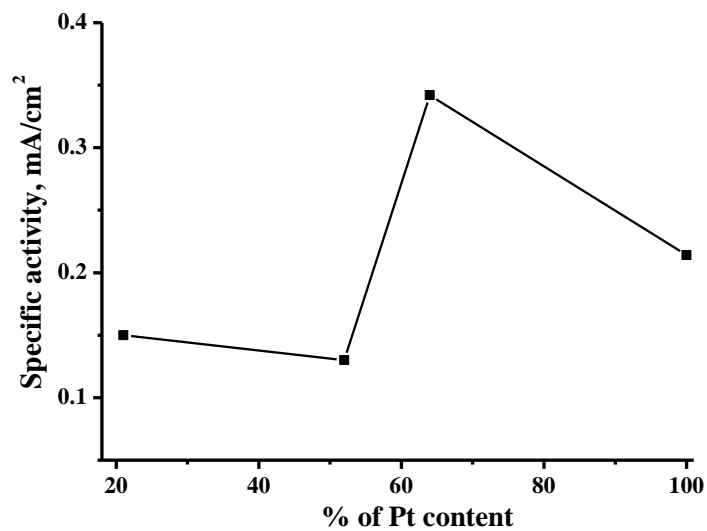

**Figure S10**

Plot illustrating the durability of different electrocatalyst towards oxygen reduction during extensive potential sweep.

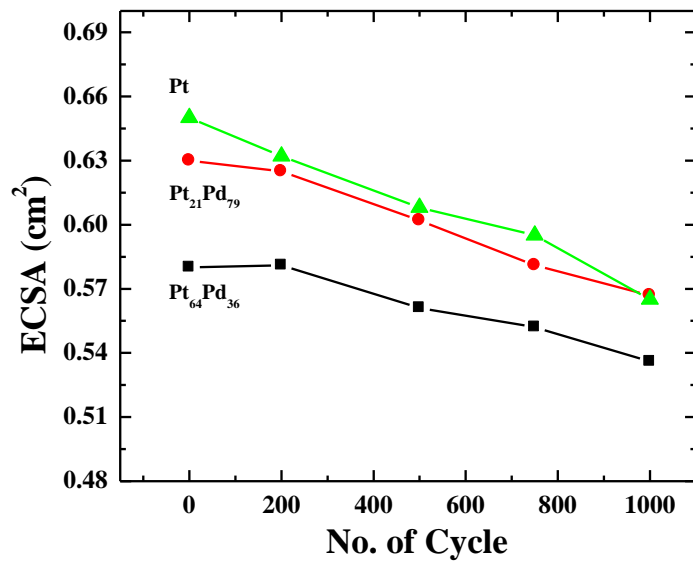

### Figure S11

Polarization curve illustrates the durability of (A) Pt<sub>21</sub>Pd<sub>79</sub>/MWCNT and (B) Pt/MWCNT electrocatalyst after 1000 potential sweep. Electrolyte: 0.5 M H<sub>2</sub>SO<sub>4</sub>. Rotation rate: 800 rpm. Scan rate: 5 mV/s. Ring potential: 0.85 V. The limiting current is normalized with the geometric surface area of the electrode.

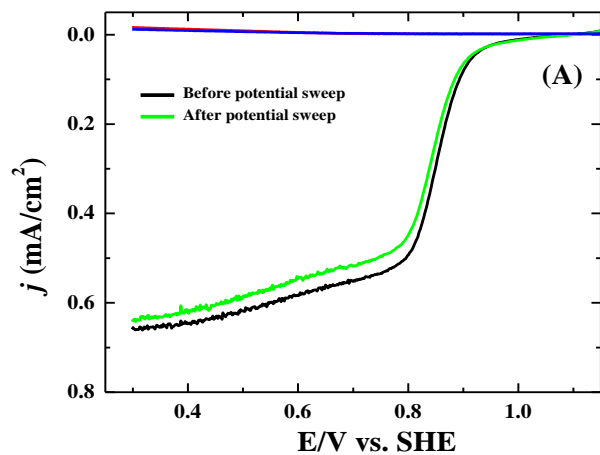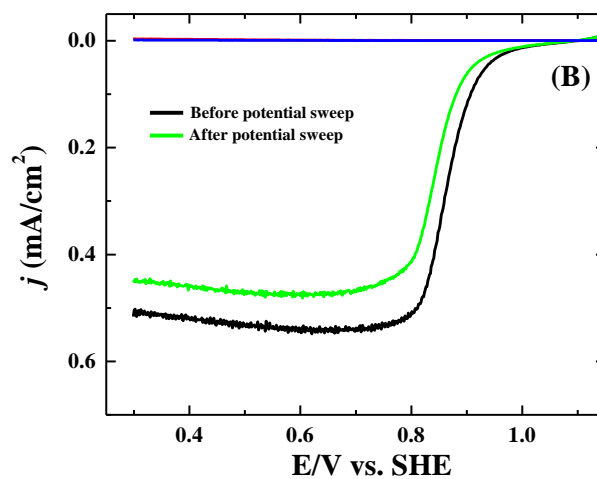

### Figure S12

Cyclic voltammograms illustrating the poor durability of nPd-based electrode during ORR in sulfuric acid solution. Scan rate: 50 mV/s. The experiment was performed in oxygen saturated. The solution was saturated with oxygen before each sweep.

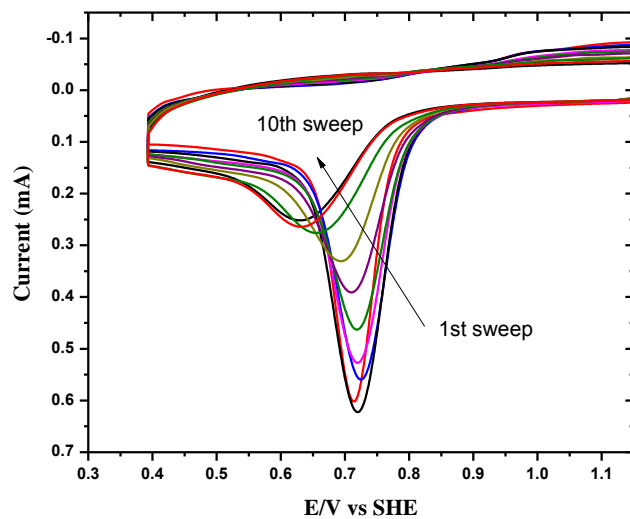

Supplement: c3ta13954a.pdf [file c3ta13954a.pdf]
